# Supplementary material for: Effects of Different TiO2/CNT Coatings of PVDF Membranes on the Filtration of Oil-Contaminated Wastewaters
Source: MDPI journal article supplement (doi:10.3390/membranes13100812), 2023-09-27
Supplement: s1 [file s1]

Supplementary material

# Effects of Different TiO<sub>2</sub>/CNT Coatings of PVDF Membranes on the Filtration of Oil-Contaminated Wastewaters

Ákos Ferenc Fazekas <sup>1,2</sup>, Tamás Gyulavári <sup>3</sup>, Zsolt Pap <sup>3,4,5</sup>, Attila Bodor <sup>6,7</sup>, Krisztián Laczi <sup>6</sup>, Katalin Perei <sup>6</sup>, Erzsébet Illés <sup>8</sup>, Zsuzsanna László <sup>1,\*</sup> and Gábor Veréb <sup>1,\*</sup>

<sup>1</sup> Department of Biosystem Engineering, Faculty of Engineering, University of Szeged, Moszkvai Blvd. 9., H-6725 Szeged, Hungary; fazekas@mk.u-szeged.hu

<sup>2</sup> Doctoral School of Environmental Sciences, University of Szeged, Rerrich Béla Sq. 1, H-6720 Szeged, Hungary

<sup>3</sup> Department of Applied and Environmental Chemistry, Institute of Chemistry, University of Szeged, Rerrich Béla Sq. 1, H-6720 Szeged, Hungary; gyulavarit@chem.u-szeged.hu (T.G.); pzsolt@chem.u-szeged.hu (Z.P.)

<sup>4</sup> Centre of Nanostructured Materials and Bio-Nano Interfaces, Institute for Interdisciplinary, Research on Bio-Nano-Sciences, Treboniu Laurian 42, RO-400271 Cluj-Napoca, Romania

<sup>5</sup> STAR-UBB Institute, Mihail Kogălniceanu 1, RO-400084 Cluj-Napoca, Romania

<sup>6</sup> Department of Biotechnology, Institute of Biology, University of Szeged, Közép Alley 52, H-6726 Szeged, Hungary; bodor.attila@brc.hu (A.B.); laczi.krisztian@brc.hu (K.L.); pereik@bio.u-szeged.hu (K.P.)

<sup>7</sup> Institute of Biophysics, Biological Research Centre, Hungarian Research Network, Temesvári Blvd. 62, H-6726 Szeged, Hungary

<sup>8</sup> Department of Food Engineering, University of Szeged, Mars Sq. 7, H-6724 Szeged, Hungary; erzsebet.illes@mk.u-szeged.hu

\* Correspondence: zsizsu@mk.u-szeged.hu (Z.L.); verebg@mk.u-szeged.hu (G.V.)

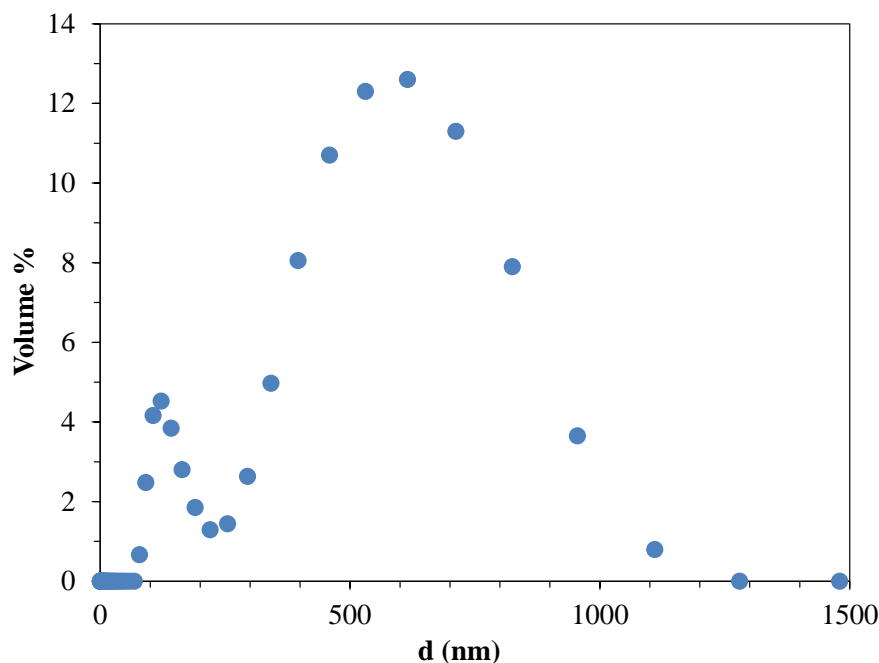

Figure S1. Oil droplet size distribution of the used oil emulsion.

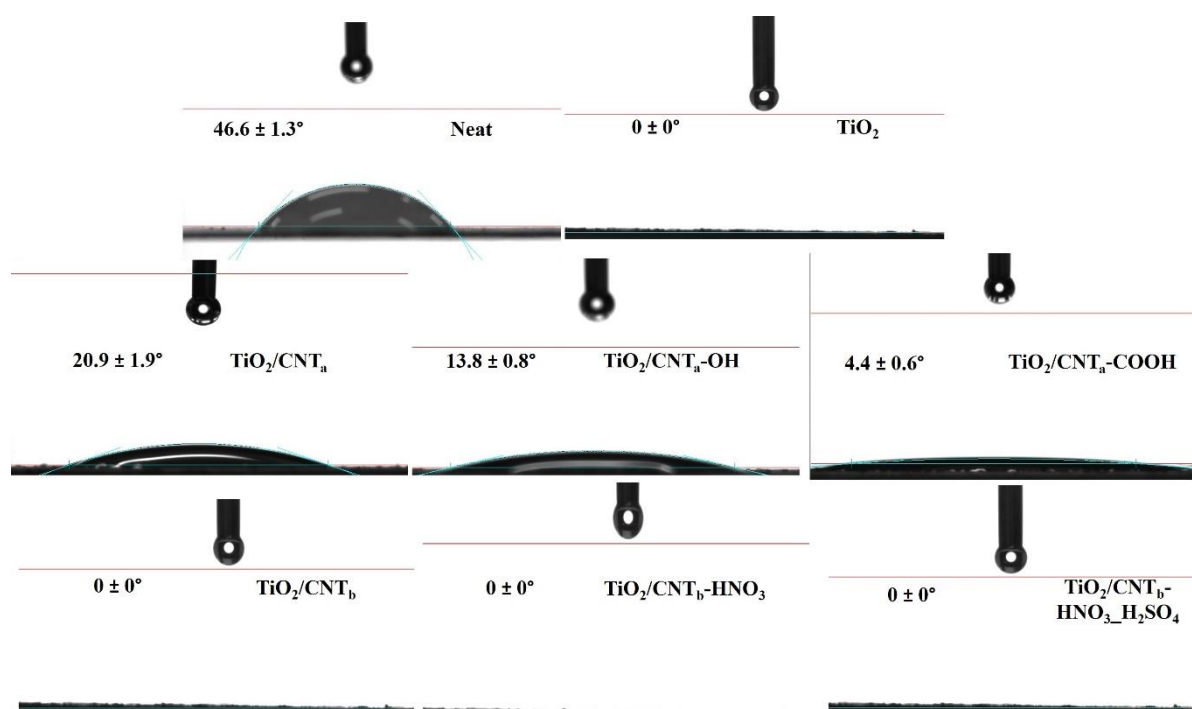

**Figure S2.** Water droplets on the different membrane surfaces and the measured contact angles (before the filtration of the oil emulsions).

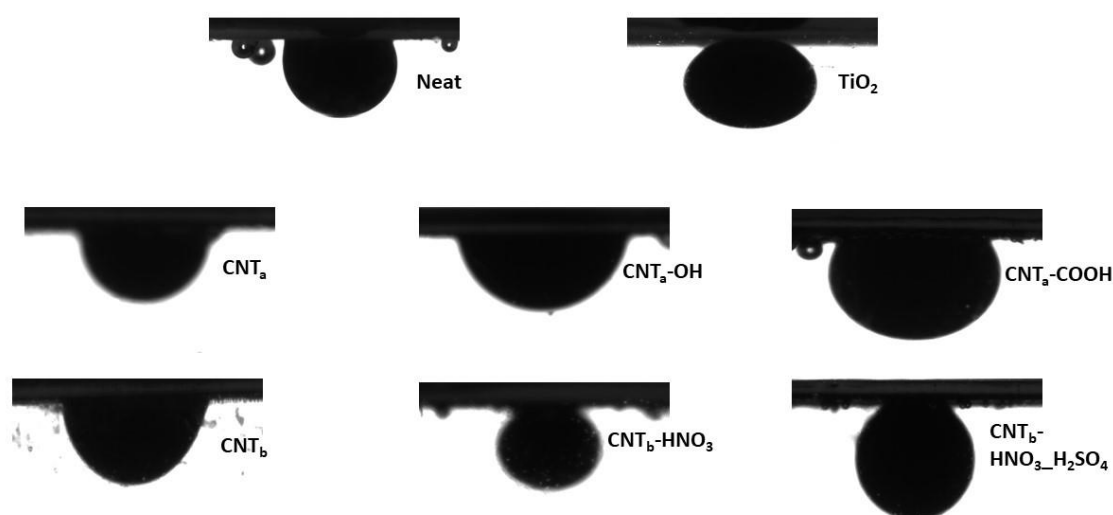

**Figure S3.** Underwater oil droplets on different membrane surfaces.

**Table S1.** Unique components detected exclusively in sample 1 crude oil (analyzed by GC-MS).

|                                    |
|------------------------------------|
| 17-Pentatriacontene                |
| 1-Iodoundecane                     |
| 1-Nonadecene                       |
| 2-Amino-1-(o-methoxyphenyl)propane |
| 2-Bromo dodecane                   |
| 2-Furanmethanamine, tetrahydro-    |

---

3,3,7,7-Tetramethyl-5-oxa-1,9-diazabicyclo[4.3.0]non-8-ene

3,5-Dimethyldodecane

4-Chloro-6-phenylpyrimidine-1-oxid

6-Amino-hex-2-en-1-ol

Anthracene

Anthracene, 1-methyl-

Benzene, 1,3-bis(3-phenoxyphenoxy)

Cyclobutene-3,4-dione, 1-dimethyl-

Cyclohexane, (1-hexyltetradecyl)-

Cyclohexane, 1,1'-(1,3-propanediyl)bis-

Cyclohexane, decyl-

Dibenzothiophene, 3-methyl-

Dodecane, 2,6,10-trimethyl-

Dodecane, 2-methyl-8-propyl-

Eicosanoic acid, hexadecyl ester

Heneicosane

Heptadecane, 3-methyl-

Heptadecane, 9-octyl-

Hexadecane, 1-iodo-

Hexadecane, 4-methyl-

Naphthalene, 1-(2-propenyl)-

Naphthalene, 1,3-dimethyl-

Naphthalene, 2,3,6-trimethyl-

Nonadecane, 2,6,10,14,18-pentamethyl-

Nonadecane, 4-methyl-

Octacosyl acetate

Octadecane, 1-chloro-

Octadecane, 1-iodo-

Octane, 2,6-dimethyl-

Pentacosane

Pentadecane, 4-methyl-

Pentadecane, 8-hexyl-

Phenanthrene, 2,5-dimethyl-

Tetradecane, 3-methyl-

Tetradecane, 6,9-dimethyl-

Triacontane

Tridecane, 1-iodo-

---

**Table S2.** Unique components detected exclusively in sample 2 crude oil (analyzed by GC-MS).

37

|                                                    |
|----------------------------------------------------|
| 1,1'-Biphenyl, 4-methyl-                           |
| 10-Methylnonadecane                                |
| 1-Docosene                                         |
| 1H-Indene, 2,3-dihydro-4,7-dimethyl-               |
| 3-Hexene, 3-ethyl-2,5-dimethyl-                    |
| Benzene, (1,1-dimethylpropyl)-                     |
| Benzene, 1,2,3,5-tetramethyl-                      |
| Benzene, 1,2,3-trimethyl-                          |
| Benzene, 1-chlorodifluoromethoxy-4-nitro-          |
| Benzene, 1-methyl-3-propyl-                        |
| Benzene, 1-methyl-4-(1-methylethyl)-               |
| Benzene, 2-ethyl-1,4-dimethyl-                     |
| Cyclohexane, 1-ethyl-2-methyl-, cis-               |
| Cyclohexane, butyl-                                |
| Cyclohexane, pentyl-                               |
| Cyclohexane, undecyl-                              |
| Cyclopentane, (1-methylethyl)-                     |
| Cyclopentane, 1-butyl-2-pentyl-                    |
| Cyclopropane, 1-methyl-1-(2-methylpropyl)-2-nonyl- |
| Decane                                             |
| Decane, 2-methyl-                                  |
| Decane, 3,7-dimethyl-                              |
| Decane, 3-methyl-                                  |
| Decane, 4-methyl-                                  |
| Decane, 5-methyl-                                  |
| Docosane                                           |
| Docosane, 11-butyl-                                |
| Dodecane, 2-methyl-6-propyl-                       |
| Dodecane, 4-methyl-                                |
| Heptacosane, 1-chloro-                             |
| Heptadecane, 2,6,10,14-tetramethyl                 |
| Hexacosane                                         |
| Hexadecane, 2-methyl-                              |
| Naphthalene                                        |
| Naphthalene, 1,4,6-trimethyl-                      |
| Naphthalene, 1,4-dimethyl-                         |
| Nonane, 5-butyl-                                   |
| Pentadecane, 2,6,10-trimethyl-                     |
| Pentadecane, 3-methyl-                             |
| Pentadecane, 7-methyl-                             |
| Tetradecane                                        |
| Tetradecane, 4,11-dimethyl-                        |
| Tridecane, 3-methyl-                               |
| Tridecane, 5-methyl-                               |
| Tridecane, 7-methyl-                               |
| Undecane                                           |
| Undecane, 2-methyl-                                |
| Undecane, 3-methyl-                                |
| Undecane, 4-methyl-                                |
| Undecane, 6-methyl-                                |

38

39
